# Supplementary material for: A β-Cyclodextrin-Based Nanoparticle with Very High Transfection Efficiency Unveils siRNA-Activated TLR3 Responses in Human Prostate Cancer Cells
Source: MDPI journal article supplement (doi:10.3390/pharmaceutics14112424), 2022-11-09

## SUPPLEMENTARY INFORMATION

|                                                                                                                       |    |
|-----------------------------------------------------------------------------------------------------------------------|----|
| <b>General Methods</b> .....                                                                                          | 2  |
| <b>Figure S1.</b> $^1\text{H}$ and $^{13}\text{C}$ NMR spectra of AMC8.....                                           | 5  |
| <b>Figure S2.</b> $^1\text{H}$ and $^{13}\text{C}$ NMR spectra of AMC8.....                                           | 6  |
| <b>Figure S3.</b> Size distribution of AMC11.....                                                                     | 7  |
| <b>Figure S4.</b> Size distribution of the nanoplex formed by AMC11 (1 $\mu\text{M}$ )<br>and SCR-siRNA (100 nM)..... | 8  |
| <b>Figure S5.</b> AMC11 interaction with siRNA.....                                                                   | 9  |
| <b>Figure S6.</b> AMC11 toxicity on glioblastoma cell lines and astrocytes.....                                       | 10 |
| <b>Figure S7.</b> AMC11-siRNA knock down of p42-MAPK protein levels in<br>glioblastoma cell lines.....                | 11 |
| <b>Figure S8.</b> AMC11-siRNA knock down of Rheb protein levels in<br>glioblastoma cell lines.....                    | 12 |
| <b>Figure S9.</b> Dose-response curve of DTX-induced toxicity in in LNCaP and PC3 cells .....                         | 13 |
| <b>Figure S10.</b> Effect of p42 or Rheb knock down on DTX-induced toxicity<br>in LNCaP and PC3 cells .....           | 14 |
| <b>Figure S11.</b> Time-course SCR-siRNA-induced production of IFN $\beta$ in<br>LNCaP and PC3 cells.....             | 15 |
| <b>Figure S12.</b> Scramble-siRNA-induced activation of caspases in LNCaP<br>and PC3 cell lines.....                  | 16 |
| <b>Original western blot gels</b> .....                                                                               | 17 |
| Figure 5.....                                                                                                         | 17 |
| Figure 7.....                                                                                                         | 21 |

## General methods

Optical rotations were measured at  $20 \pm 2$  °C in 1-dm tubes on a Jasco P-2000 polarimeter. Ultraviolet-visible (UV) spectra were recorded in 1-cm tubes on a Jasco V-630 spectrophotometer. Infrared (IR) spectra were recorded on a Jasco ATR MIRacle™ spectrophotometer.  $^1\text{H}$  (and  $^{13}\text{C}$  NMR) spectra were recorded at 500 (125.7) MHz with Bruker 500 DRX. 1D TOCSY, 2D COSY, HMQC and HSQC experiments were used to assist on NMR assignments. Thin-layer chromatography (TLC) was carried out on aluminium sheets coated with Kieselgel 60 F254 (E. Merck), with visualization by UV light and by charring with 10%  $\text{H}_2\text{SO}_4$ . With preparative purposes, column chromatography was carried out on Silica Gel 60 (E. Merck, 230-400 mesh). Electrospray mass spectra were obtained for samples dissolved in MeOH or  $\text{H}_2\text{O}$ -MeOH mixtures at low  $\mu\text{M}$  concentrations. Elemental analyses were carried out at the Instituto de Investigaciones Químicas (Sevilla, Spain) using an elemental analyser *Leco CHNS-932* o *Leco TruSpec CHN*. Heptakis [6-(2-isothiocyanatoethylthio)-2,3-di-*O*-hexanoyl]-cyclomaltoheptaose (**PBO235**) and  $\text{N}^1, \text{N}^2, \text{N}^3, \text{N}^4$ -tetra(*tert*-butoxycarbonyl)-tetraethylenepentamine (**AMC1**) were combined to obtain AMC8 or AMC11.

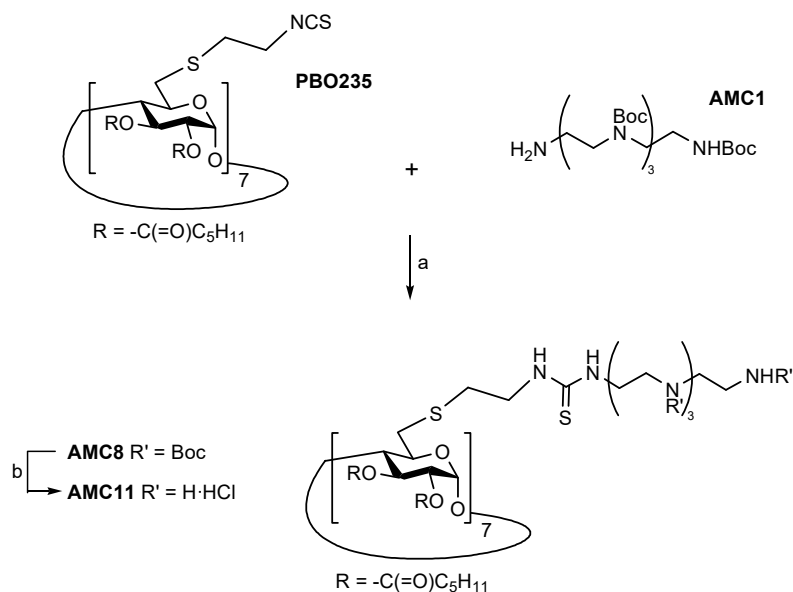

**Scheme S1.** Synthesis of amphiphilic CD **AMC11**: a) Et<sub>3</sub>N, DMF, rt, 2h, 74%; b) 1:1 TFA-DCM, rt, 2h, quantitative.

**Heptakis[6-deoxy-2,3-di-*O*-hexanoyl-6-[2[-*N'*-[triethylenetetra[(*tert*-butoxycarbonyl)-amino]ethylene]thioureido]ethyltio]]cyclomaltoheptaose (AMC8).** To a solution of **PBO235** (100 mg, 0.031 mmol) and **AMC1** (138 mg, 0.235 mmol) in dry DMF (5 mL), Et<sub>3</sub>N (0.030 mL, 0.217 mmol) was added and the reaction mixture was stirred at rt for 2 hours. The solvent was removed under vacuum and the residue purified by column chromatography (25:1 → 20:1 DCM-MeOH) to give **AMC8** as an amorphous solid. Yield: 168 mg (74%); *R<sub>f</sub>* = 0.45 (9:1 CH<sub>2</sub>Cl<sub>2</sub>:MeOH); [ $\alpha$ ]<sub>D</sub> = +40.7 (*c* 0.97, DCM); UV (DCM): 249 nm ( $\epsilon$ <sub>mM</sub> 109.5); IR:  $\nu_{\text{max}}$  = 3342, 2971, 2931, 1752, 1697, 1366, 1247, 1164 cm<sup>-1</sup>; <sup>1</sup>H NMR (500 MHz, CD<sub>3</sub>OD, 333 K):  $\delta$  = 5.35 (t, 7 H, *J*<sub>2,3</sub> = *J*<sub>3,4</sub> = 8.0 Hz, H-3), 5.18 (d, 7H, *J*<sub>1,2</sub> = 3.5 Hz, H-1), 4.85 (dd, 7 H, H-2), 4.20 (m, 7 H, H-5), 3.95 (t, 7 H, H-4), 3.77, 3.68 (2 bt, 28 H, CH<sub>2</sub>NHCS), 3.46-3.32 (m, 70 H, CH<sub>2</sub>), 3.28 (bd, 7 H, *J*<sub>6a,6b</sub> = 12.0 Hz, H-6a), 3.22 (t, 14 H, <sup>3</sup>*J*<sub>H,H</sub> = 6.0 Hz, CH<sub>2</sub>NHBoc), 3.19 (dd, 7 H, *J*<sub>5,6b</sub> = 5.2 Hz, H-6b), 2.94 (m, 14H, CH<sub>2</sub>S), 2.46 (m, 14 H, H-2a<sub>Hex</sub>), 2.31 (m, 14 H, H-2b<sub>Hex</sub>), 1.66 (m, 28 H, H-3<sub>Hex</sub>), 1.51, 1.50, 1.46 (s, 63 H, CMe<sub>3</sub>), 1.41 (m, 28 H, H-4<sub>Hex</sub>), 1.37-1.31 (m, 28 H, H-5<sub>Hex</sub>), 0.95 (m, 42 H, H-6<sub>Hex</sub>); <sup>13</sup>C NMR (125.7 MHz, CD<sub>3</sub>OD, 323 K):  $\delta$  = 183.0 (CS), 173.2, 172.0 (C-1<sub>Hex</sub>), 156.8, 155.9, 155.7 (CO carbamate), 96.8 (C-1), 80.0 (CMe<sub>3</sub>), 78.6 (C-4), 71.9 (C-5), 70.6 (C-3), 70.3 (C-2), 45.2 (CH<sub>2</sub>), 43.8, 42.4 (CH<sub>2</sub>NHCS), 38.6 (CH<sub>2</sub>NHBoc), 33.9 (C-6), 33.8, 33.7 (C-2<sub>Hex</sub>), 32.8 (CH<sub>2</sub>S), 31.2, 31.1 (C-4<sub>Hex</sub>), 27.7 , 27.6, 27.5 (CMe<sub>3</sub>), 24.2 (C-3<sub>Hex</sub>), 22.1 (C-5<sub>Hex</sub>), 13.1, 12.9 (C-6<sub>Hex</sub>); ESIMS: *m/z* = 3694.3 [M + 2Na]<sup>2+</sup>. Anal. Calcd for C<sub>343</sub>H<sub>616</sub>N<sub>42</sub>O<sub>98</sub>S<sub>14</sub> (7345.56): calcd. C, 56.08; H, 8.45; N, 8.09; found: C, 56.17; H, 8.35; N, 7.84.

**Heptakis[6-deoxy-2,3-di-*O*-hexanoyl-6[-2[-*N'*-[triethylenetetramino]ethylene]-thioureido]ethyltio]]cyclomaltoheptaose hydrochloride (AMC11)** Compound **AMC8** (138 mg, 0.019 mmol) was treated with TFA-CH<sub>2</sub>Cl<sub>2</sub> (1:1, 4 mL) at room temperature for 2 h. Then solvent was evaporated and acid traces removed by co-evaporation with water, and the residue was solved in 10:1 H<sub>2</sub>O-HCl 0.1 M and freeze-dried to yield quantitatively **AMC11**. Yield: 104 m;  $R_f$  = 0.10 (5:3:5 CH<sub>3</sub>CN-H<sub>2</sub>O-NH<sub>4</sub>OH); [ $\alpha$ ]<sub>D</sub> = +34.3 ( $c$  1.05, MeOH); UV (MeOH): 244 nm ( $\epsilon$ <sub>mM</sub> 26.42); <sup>1</sup>H NMR (500 MHz, 5:1 CD<sub>3</sub>OD-D<sub>2</sub>O, 333 K):  $\delta$  = 5.32 (t, 7 H,  $J_{2,3} = J_{3,4} = 8.5$  Hz, H-3), 5.17 (d, 7H,  $J_{1,2} = 3.5$  Hz, H-1), 4.85 (dd, 7 H, H-2), 4.16 (bs, 7 H, H-5), 3.95 (t, 14 H,  $^3J_{H,H} = 6$  Hz, CH<sub>2</sub>NHCS), 3.92 (t, 7 H, H-4), 3.74 (bs, 14 H, CH<sub>2</sub>NHCS), 3.49-3.32 (m, 84 H, CH<sub>2</sub>), 3.25 (bd, 7 H,  $J_{6a,6b} = 13.0$  Hz, H-6a), 3.15 (dd, 7 H,  $J_{5,6b} = 5.5$  Hz, H-6b), 2.92 (m, 14H, CH<sub>2</sub>S), 2.45 (m, 14 H, H-2a<sub>Hex</sub>), 2.31 (m, 14 H, H-2b<sub>Hex</sub>), 1.62 (m, 28 H, H-3<sub>Hex</sub>), 1.41 (m, 28 H, H-4<sub>Hex</sub>), 1.36 (m, 28 H, H-5<sub>Hex</sub>), 0.93 (m, 42 H, H-6<sub>Hex</sub>); <sup>13</sup>C NMR (125.7 MHz, 5:1 CD<sub>3</sub>OD-D<sub>2</sub>O, 333 K):  $\delta$  = 183.0 (CS), 173.9, 172.3 (C-1<sub>Hex</sub>), 96.9 (C-1), 78.8 (C-4), 71.9 (C-5), 70.7 (C-3), 70.3 (C-2), 45.7, 45.3, 44.8 (CH<sub>2</sub>), 44.2 (CH<sub>2</sub>NHCS), 43.9 (CH<sub>2</sub>), 40.2 (CH<sub>2</sub>NHCS), 34.0(C-6), 33.8, 33.7 (C-2<sub>Hex</sub>), 32.6 (CH<sub>2</sub>S), 31.1, 31.0 (C-4<sub>Hex</sub>), 24.2, 24.1 (C-3<sub>Hex</sub>), 22.0 (C-5<sub>Hex</sub>), 13.2, 13.0 (C-6<sub>Hex</sub>); ESIMS:  $m/z$  = 1515.1 [M + Na + 2 H]<sup>3+</sup>. Anal. Calcd for C<sub>198</sub>H<sub>410</sub>N<sub>42</sub>O<sub>42</sub>S<sub>14</sub>Cl<sub>28</sub>·24 H<sub>2</sub>O (6057.71): calcd. C, 41.44; H, 7.62; N, 9.71; S, 7.41; found: C, 41.30; H, 7.60; N, 10.11; S, 7.71.

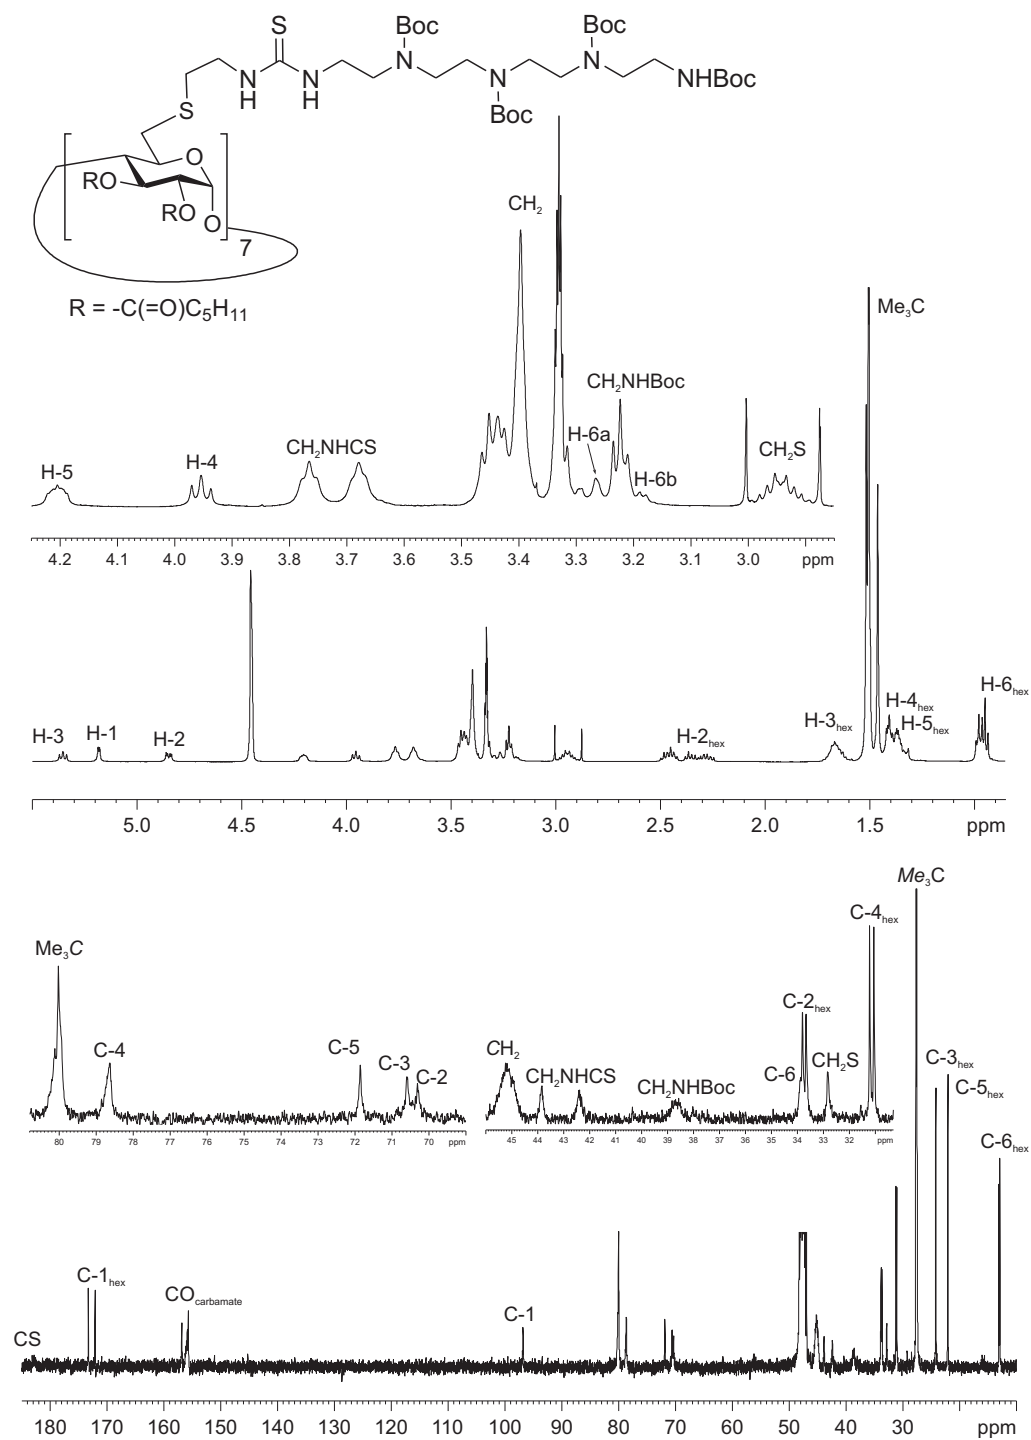

**Figure S1.  $^1H$  and  $^{13}C$  NMR spectra (500 MHz, 125.7 MHz,  $CD_3OD$ , 333 K and 323 K, respectively) of AMC8.**

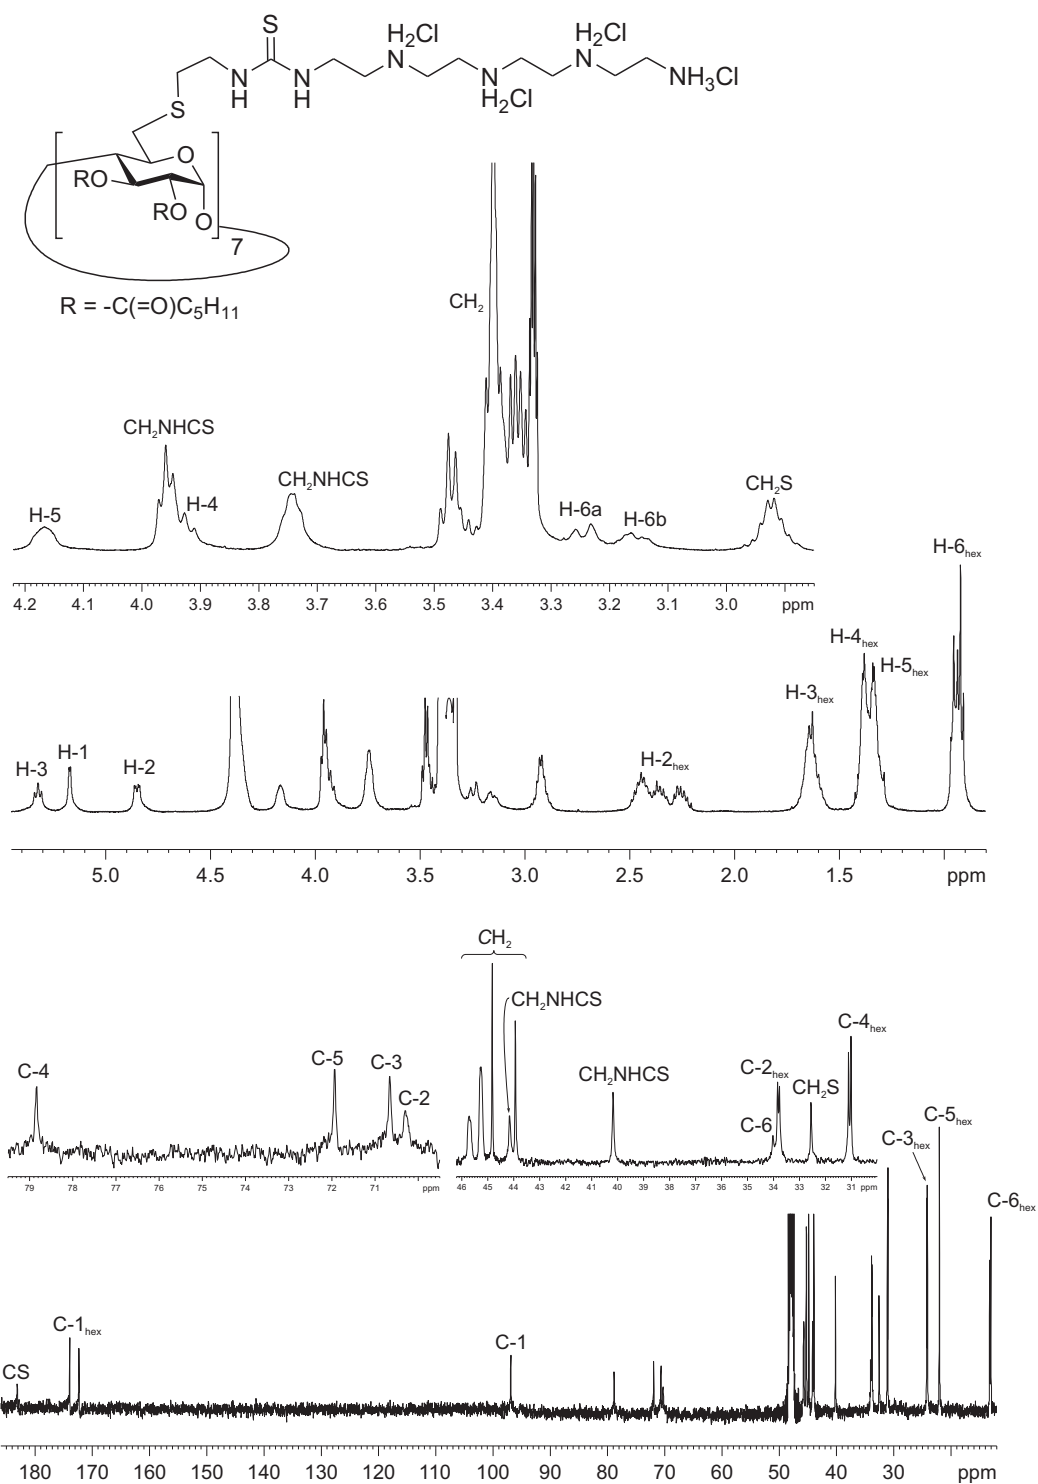

**Figure S2.** <sup>1</sup>H and <sup>13</sup>C NMR spectra (500 MHz, 125.7 MHz, 5:1 CD<sub>3</sub>OD-D<sub>2</sub>O, 323 K) of AMC11.

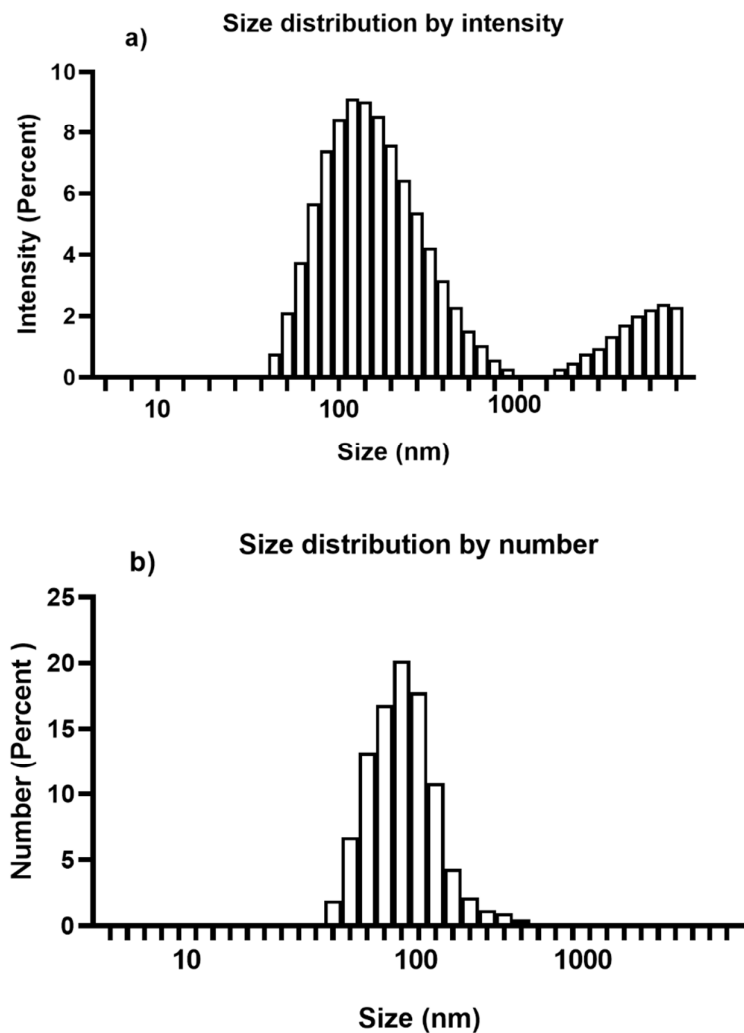

**Figure S3** Size distribution by a) intensity and b) number of AMC11. Average size: 169.7 nm (Polydispersity Index, PI, 0.459).  $\zeta$ -potential:  $57.6 \pm 1.39$  (Mean  $\pm$  S.E.M. of 4 measurements).

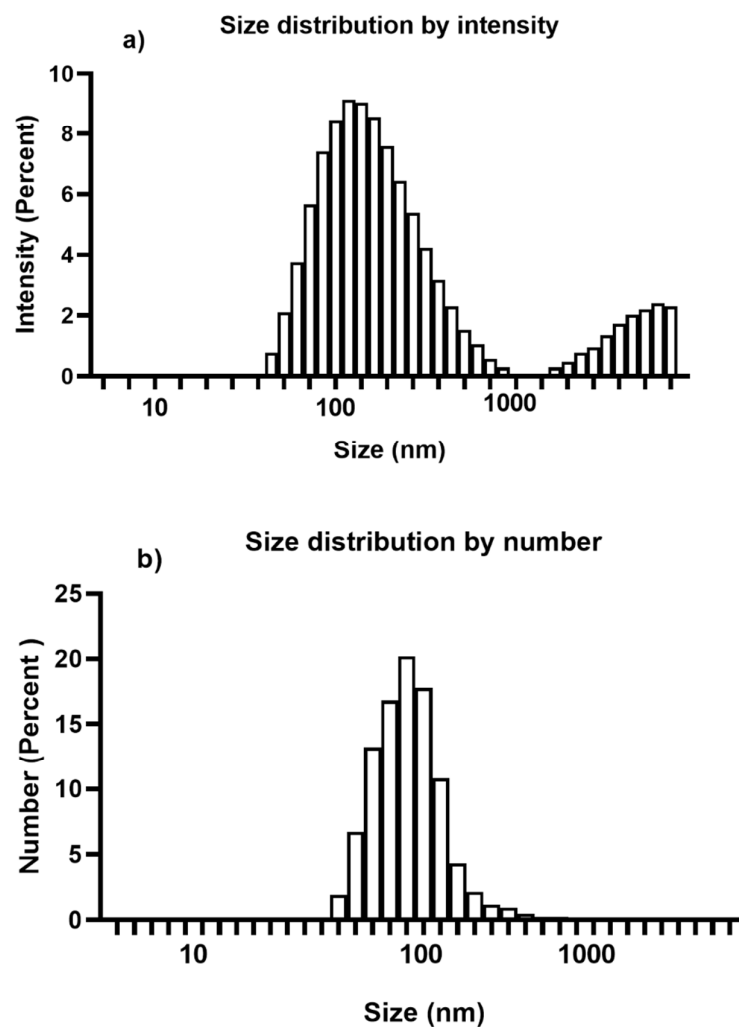

**Figure S4.** Size distribution by a) intensity and b) number of the nanoplex formed by AMC11 (1  $\mu$ M) and SCR-siRNA (100 nM). Average size: 100.5 nm (PI 0.261).  $\zeta$ -potential:  $25.38 \pm 0.46$  ( $2.0 \pm 0.03$ ). Data represent a representative experiment (Mean  $\pm$  S.E.M. of 3 measurements).



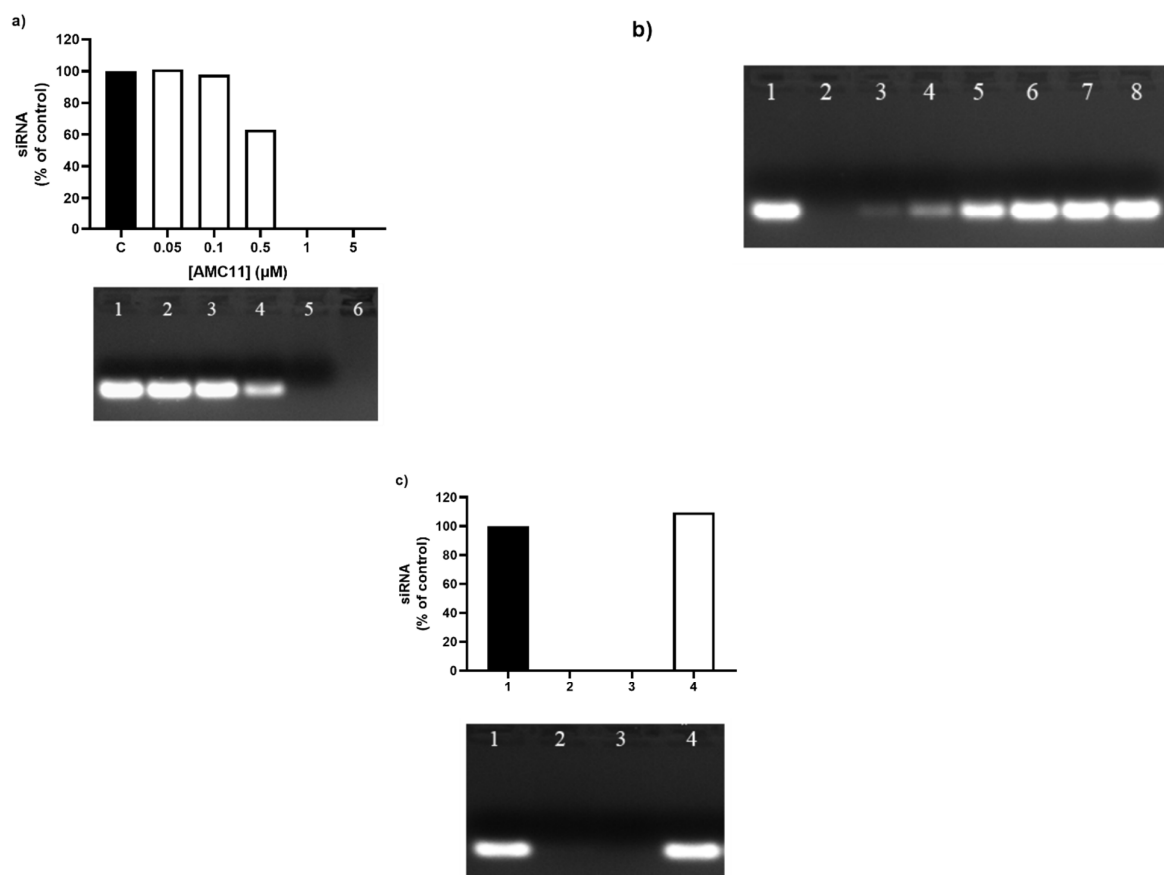

**Figure S5. AMC11 interaction with siRNA.** a) Gel retardation assay. A fix amount of SCR-siRNA (100 nM) was incubated with increasing concentrations of AMC11 ranging from 50 nM to 5  $\mu$ M. The upper part of the graph represents the siRNA percentage found observed in each lane as compared to control value (C) in one experiment, repeated 3 times with similar results. b) Heparin displacement assay. Nanoplexes were formed at a N/P ratio of 6.66 (1  $\mu$ M AMC11 and 100 nM siRNA) and exposed to increasing heparin concentrations ranging from 0.01 to 0.2 USP units (lanes 2 to 8). c) RNase protection assay. Lane 1: free siRNA (control). Lane 2: SCR-siRNA 100 nM + AMC11 1  $\mu$ M (nanoplex). Lane 3: free SCR-siRNA + RNase + Heparin. Lane 4: Nanoplex + RNase + Heparin. The upper graph represents SCR-siRNA percentage obtained in each lane compared with the control. The figure shows a representative experiment repeated 3 times with similar results.

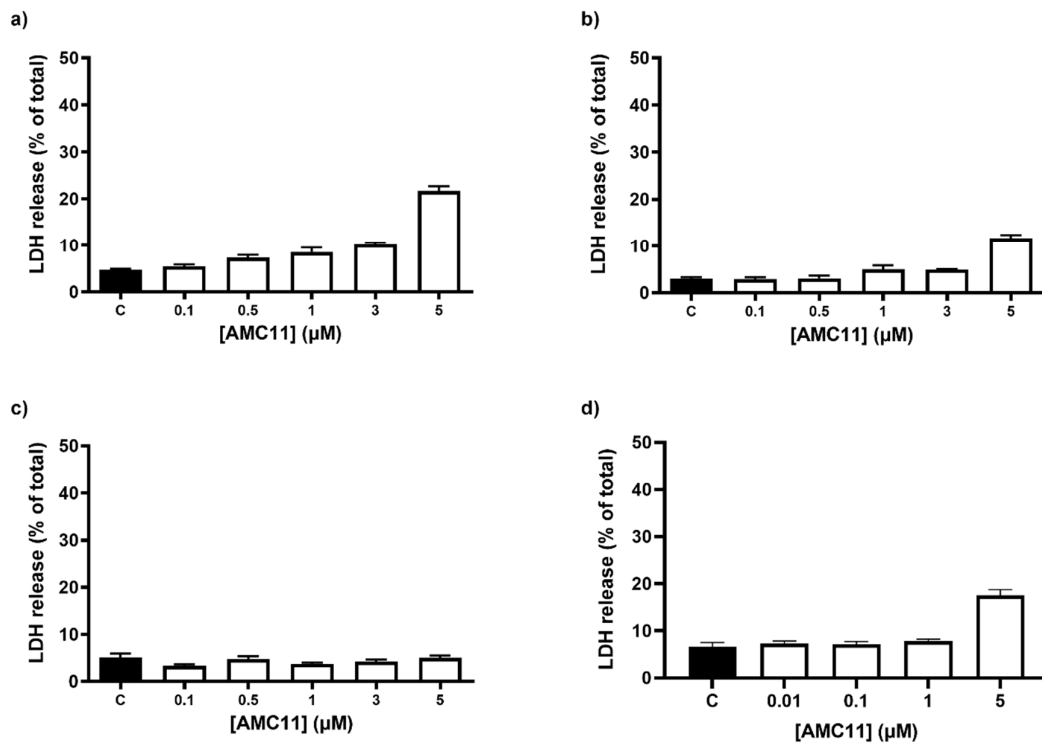

**Figure S6. AMC11 toxicity on glioblastoma cell lines and astrocytes.** Glioblastoma cell lines a) rat C6, b) mouse GL261, c) human T98G, and d) rat astrocytes were exposed to increasing AMC11 concentrations ranging 0.1 to 5  $\mu\text{M}$  for 72 h. Then, the percentage of LDH release was determined as an index of cell death. Data represent mean  $\pm$  S.E.M of 8 to 12 determinations.

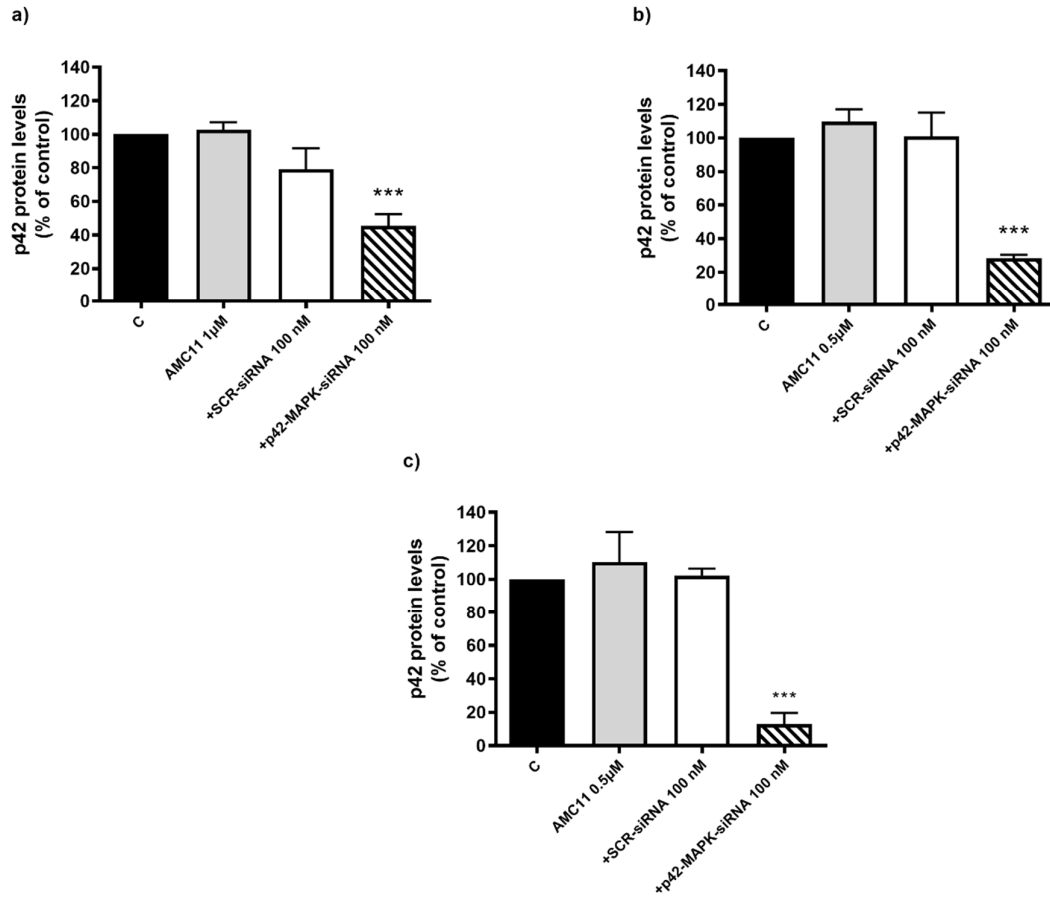

**Figure S7. AMC11-siRNA knock down of p42-MAPK protein levels in a) C6, b) U87, and c) GL261 glioblastoma cell lines.** Cells were exposed for 72 h to the indicated treatments and the specific protein levels determined as indicated in Material and Methods. Western blot bands show representative experiments for each experimental condition. Data represent mean  $\pm$  S.E.M. of 4 experiments: \*\*\* $p < 0.001$  as compared to control values.

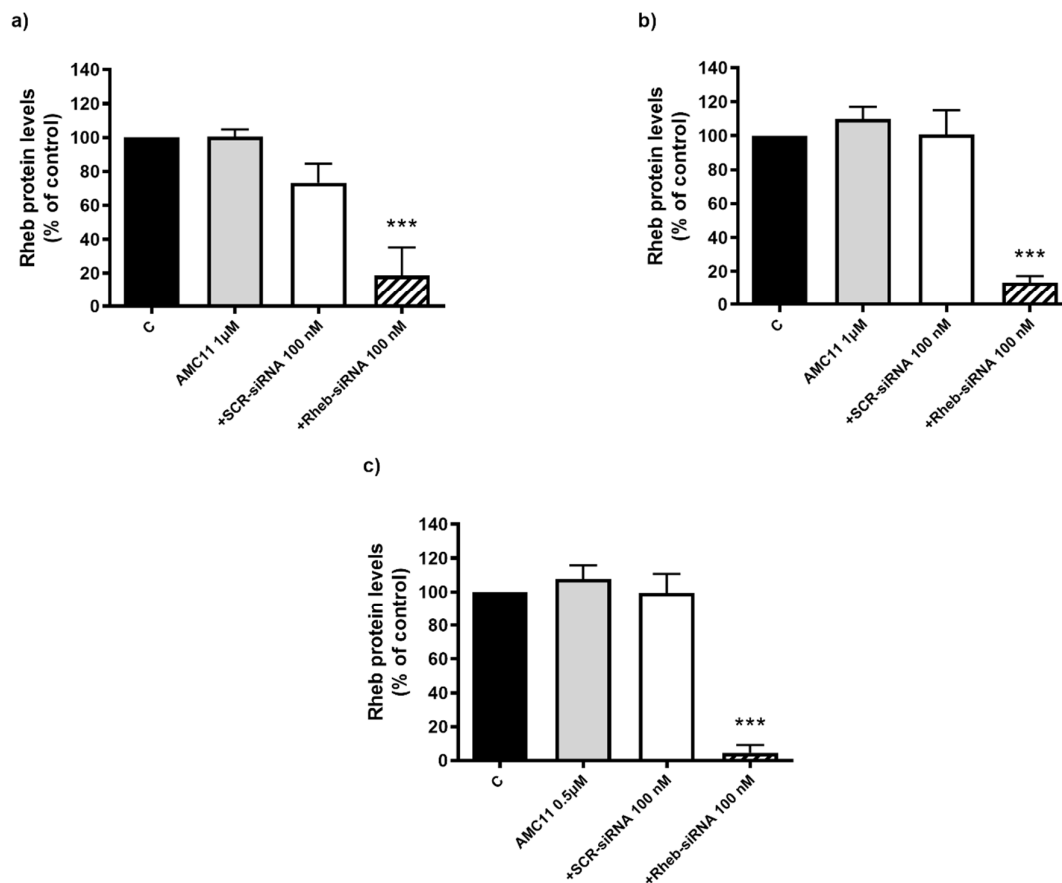

**Figure S8. AMC11-siRNA knock down of Rheb protein levels in a) C6, b) U87, and c) GL261 glioblastoma cell lines.** Cells were exposed for 72 h to the indicated treatments and the specific protein levels determined as indicated in Material and Methods. Western blot bands show representative experiments for each experimental condition. Data represent mean  $\pm$  S.E.M. of 3-5 experiments: \*\*\* $p < 0.001$  as compared to control values.

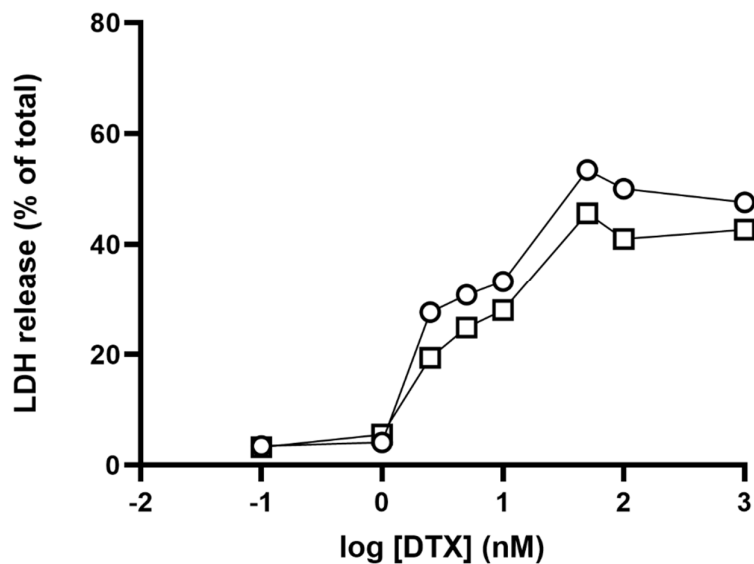

**Figure S9. Dose-response curve of DTX-induced toxicity in LNCaP (○) and PC3 (□) cells.** Effect of increasing concentrations of DTX in LNCaP and PC3 after 72 h of incubation. Cells were exposed to increasing concentrations of DTX for 72 h and the percentage of LDH released to culture medium was determined. Data represent mean  $\pm$  SEM of 28 to 377 experiments. Error bars are smaller than the symbol size.

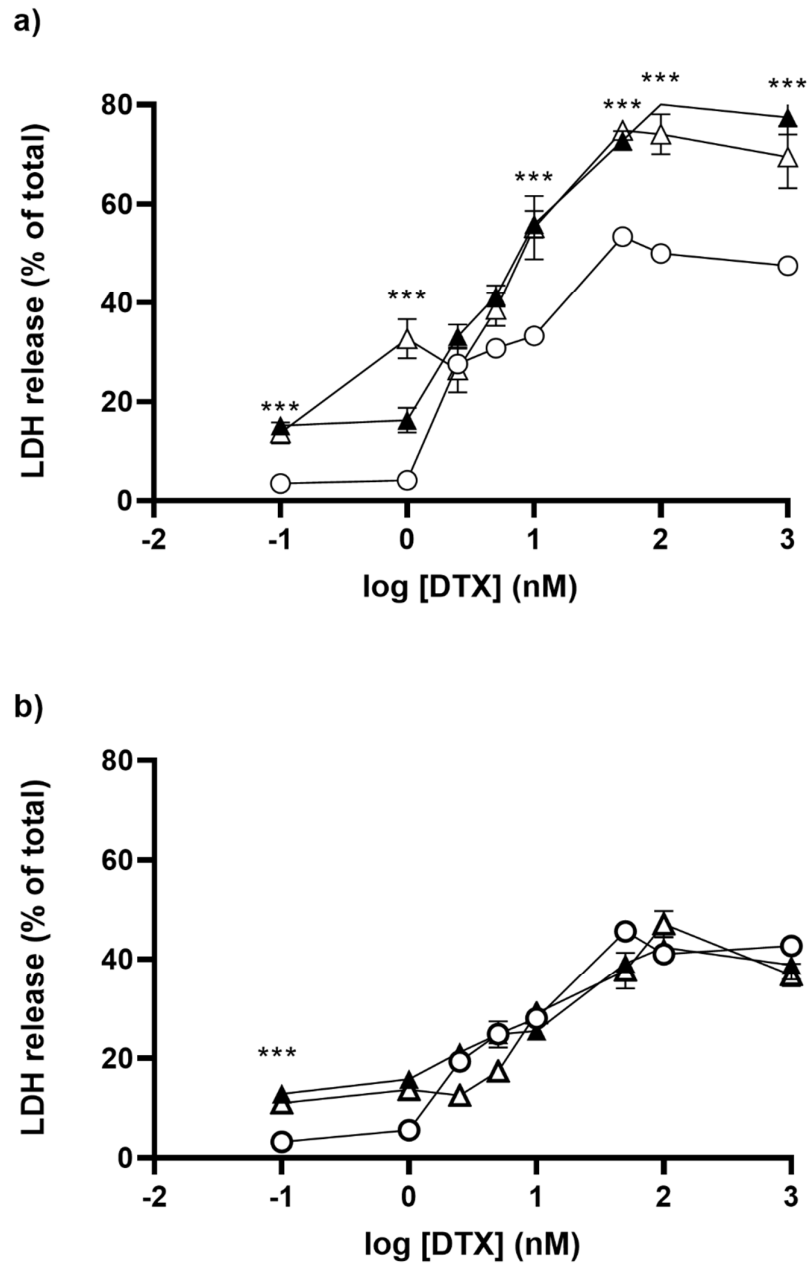

**Figure S10. Effect of p42 (▲) or Rheb (△) knock down on DTX (○)-induced toxicity in a) LNCaP and b) PC3 cells.** Data represent mean  $\pm$  SEM of 8 – 22 experiments for siRNA treated cells. DTX dose-response curves in absence of siRNA are the same as shown in figure S9. If absent, error bars are smaller than the symbol size. \*\*\* $p < 0.001$  as compared to DTX in absence of siRNA.

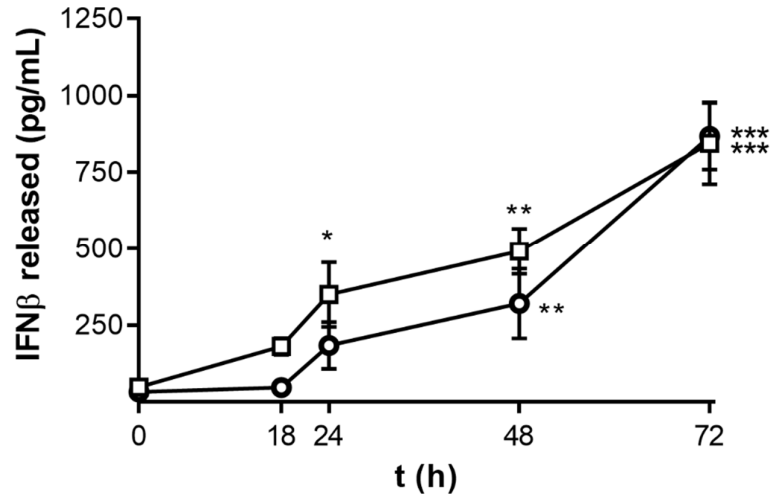

**Figure S11. Time-course SCR-siRNA-induced production of IFN $\beta$  in LNCaP (○) and PC3 (□) cells.** Cells were treated with nanoplexes formed by AMC11 (1  $\mu$ M) + SCR-siRNA (100 nM) for the indicated times and IFN $\beta$  determined as indicated in Material and Methods. Data are expressed as mean  $\pm$  S.E.M. from 6 to 12 determinations from at least three different experiments. \* $p < 0.05$ ; \*\* $p < 0.01$ ; \*\*\* $p < 0.001$  compared with untreated cells.

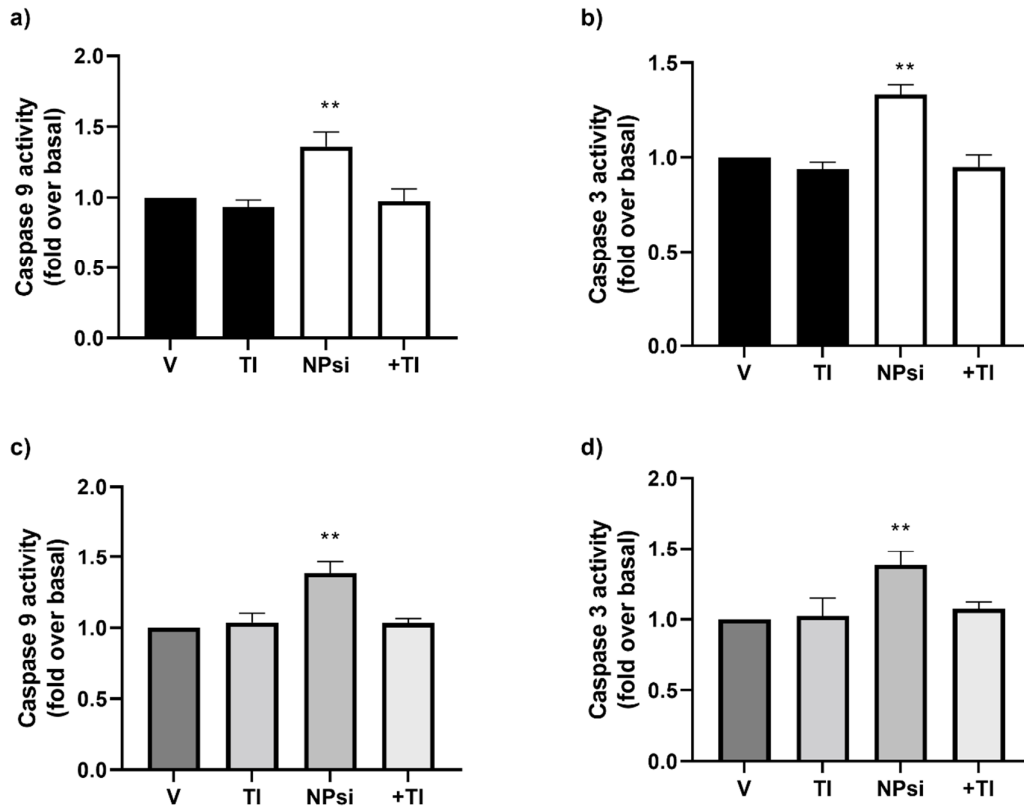

**Figure S12. Scramble-siRNA-induced activation of caspases in LNCaP (a, b) and PC3 (c, d).**

**cell lines.** Cells were treated with nanoplexes formed by AMC11 (1  $\mu$ M) and SCR-siRNA (NPsi, 100 nM) for 24 h and Caspase 3 (a, c) and 9 (b, d) enzymatic activities were determined in presence and absence of a TLR3 inhibitor (TI, 10  $\mu$ M). Data are expressed as mean  $\pm$  S.E.M. from 4 to 6 experiments. \*\*p<0.01 compared with control-treated cells.



# Original western blot gels

## Figure 5

p42-MAPK

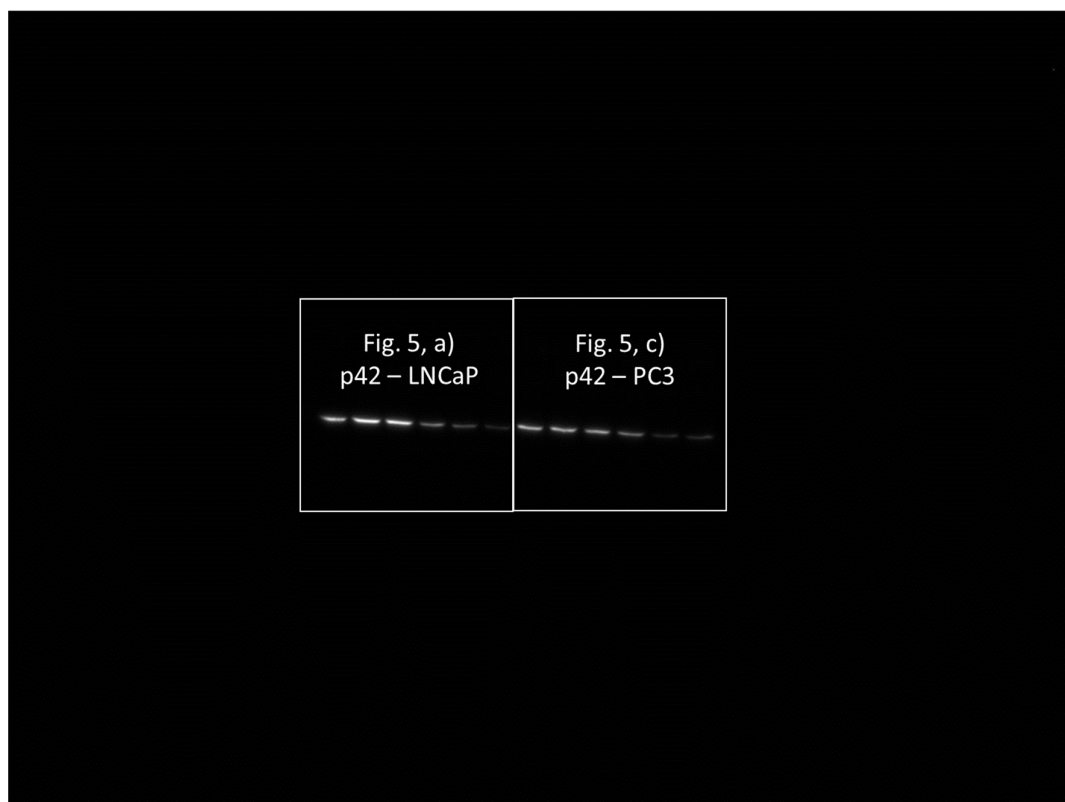

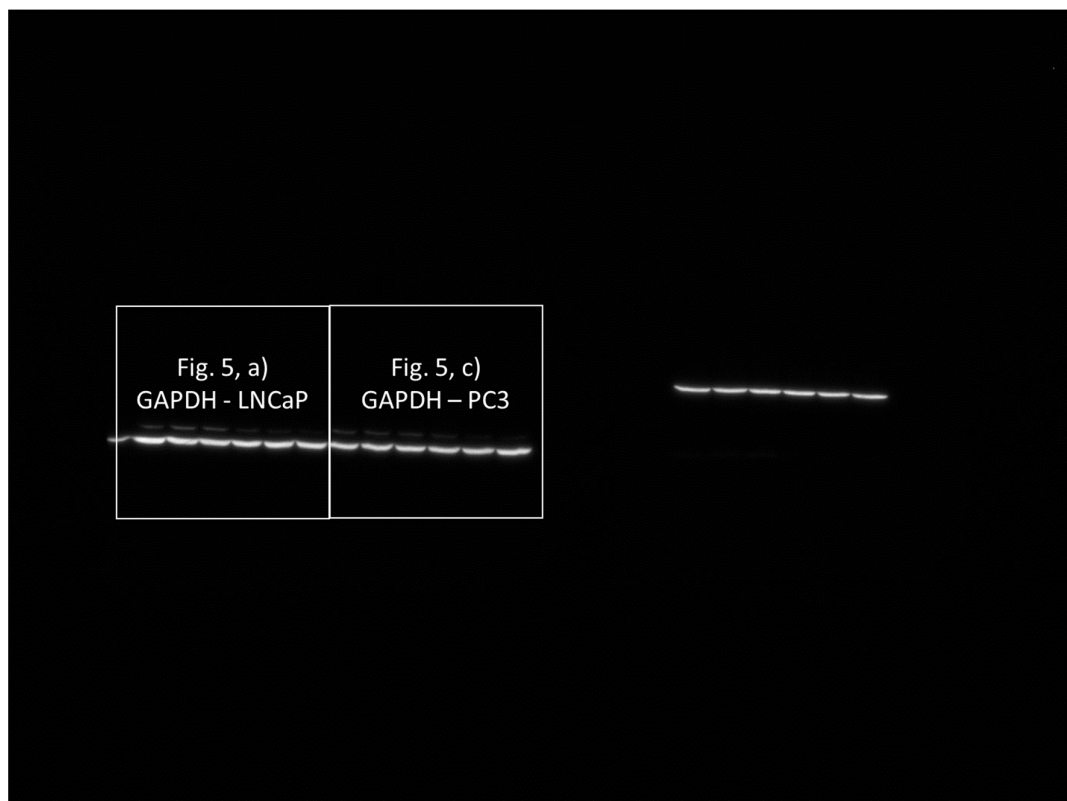

## Rheb

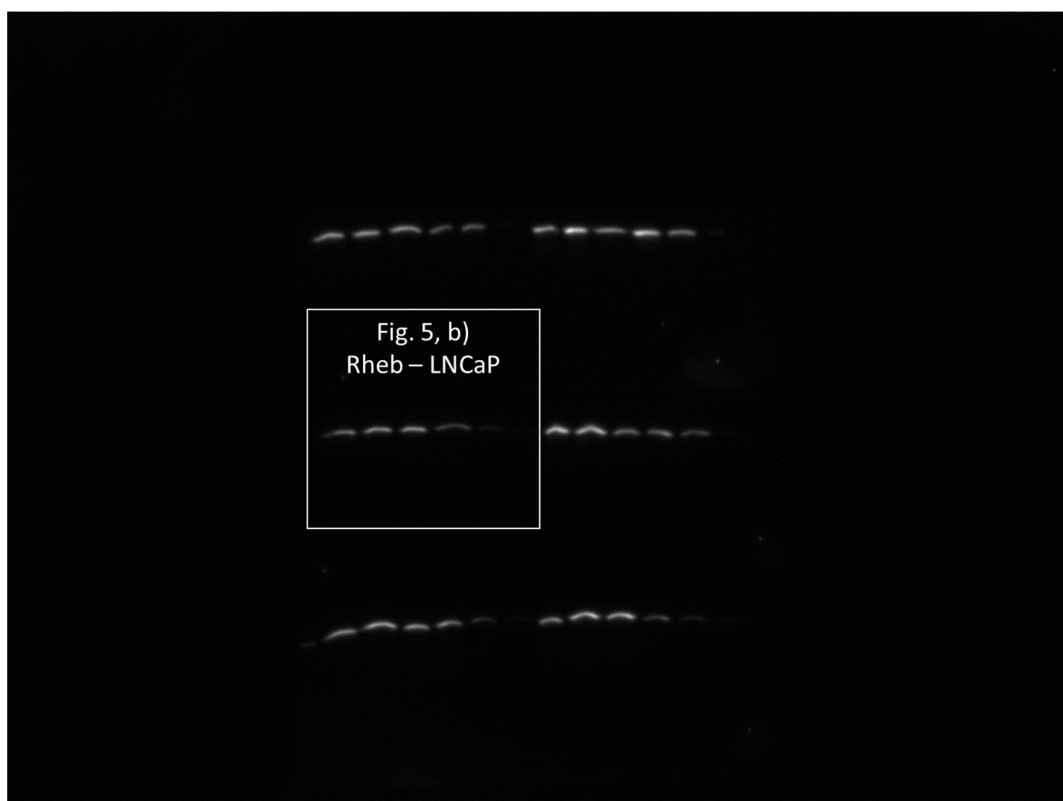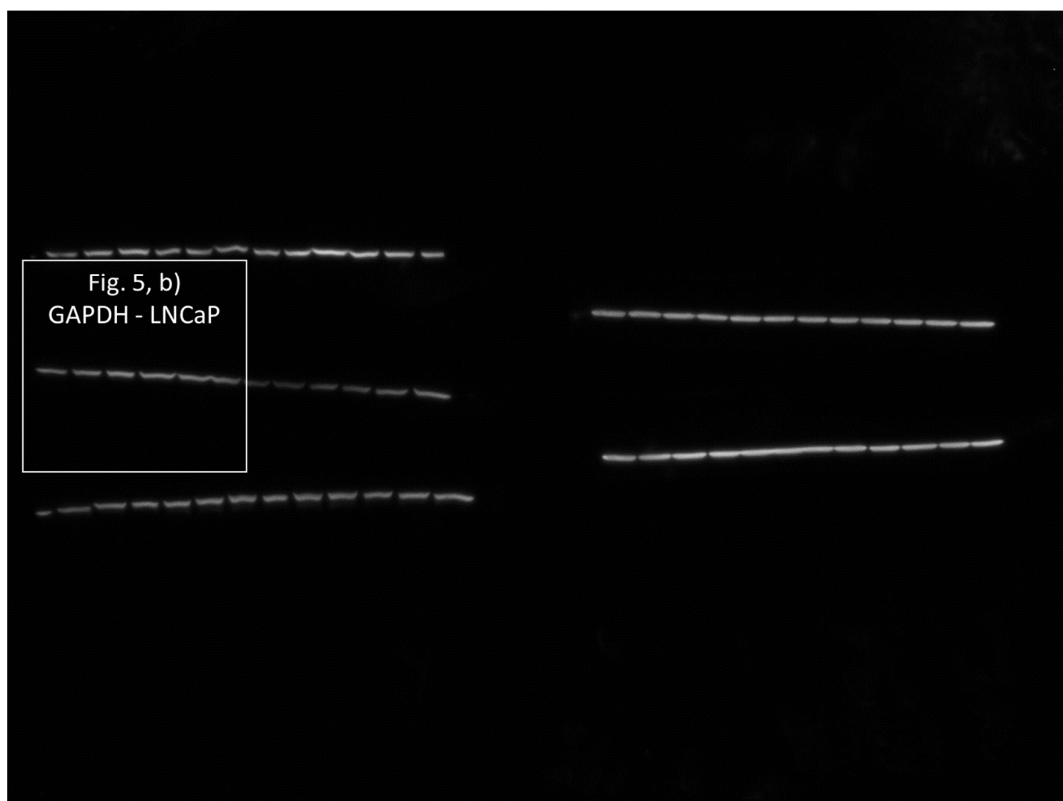

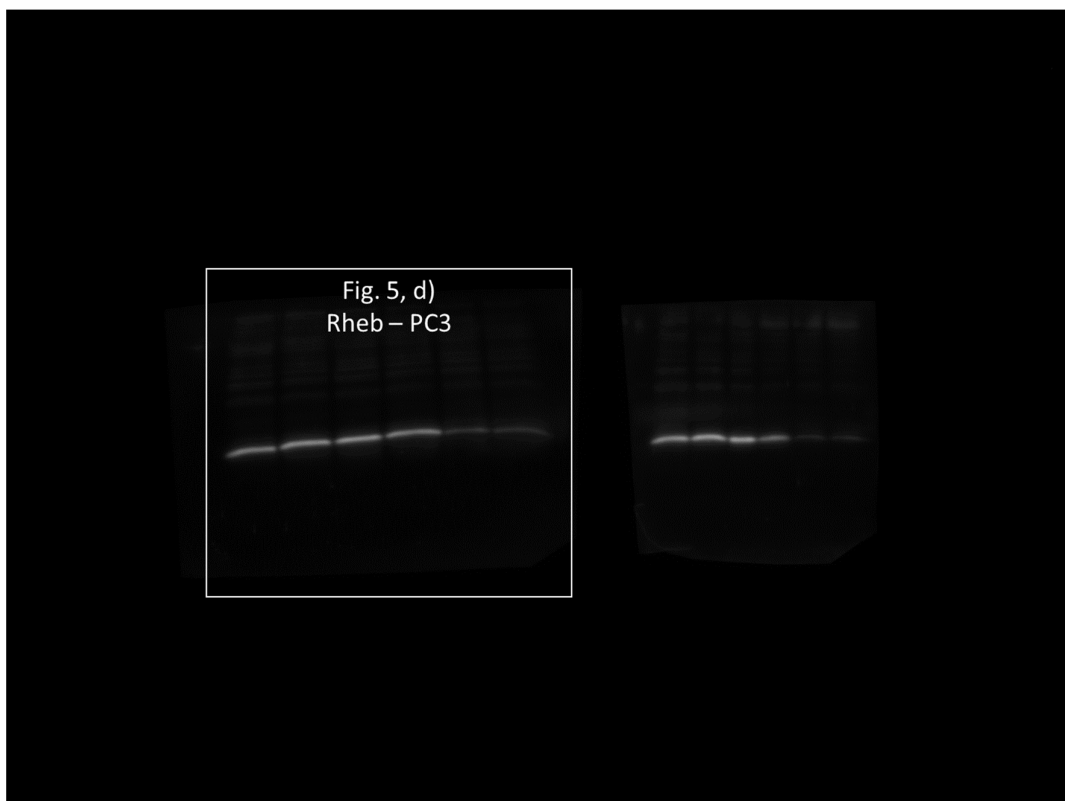

## Figure 7

Figure 7a. pIRF3

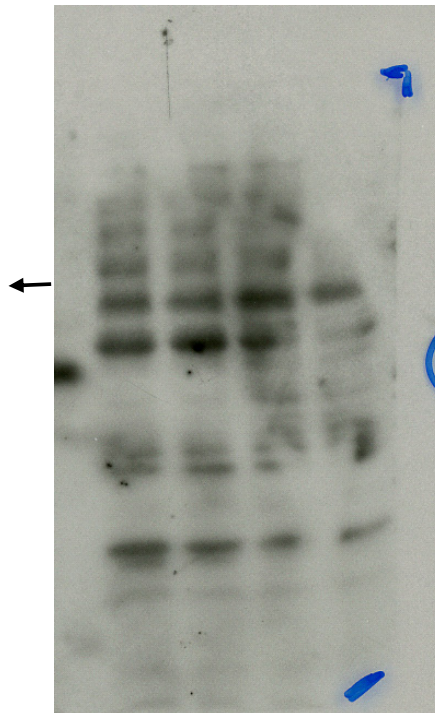

**Figure 7a. IRF3**

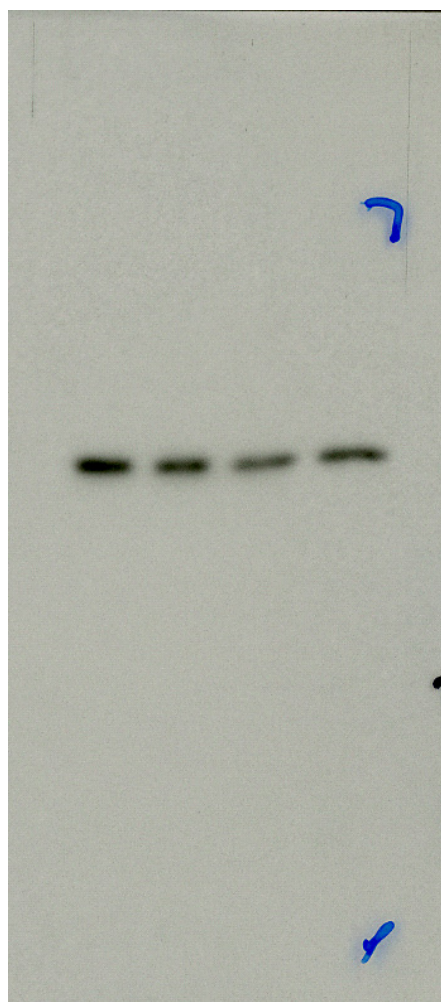

**Figure 7a. Tubulin**

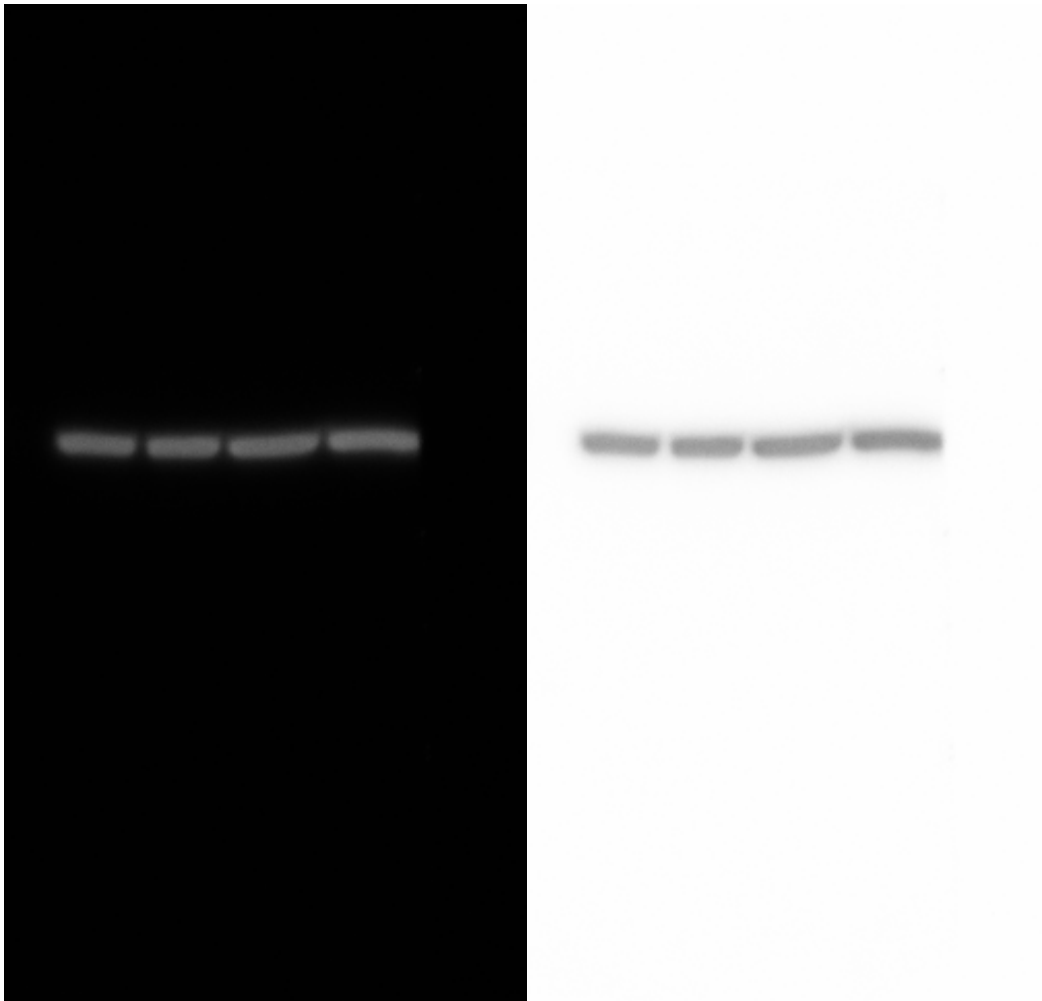

**Figure 7b. pIRF3**

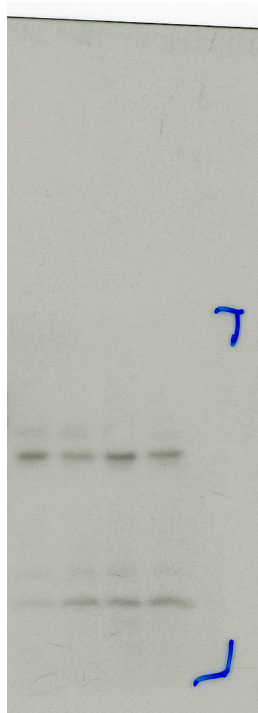



**Figure 7b. IRF3**

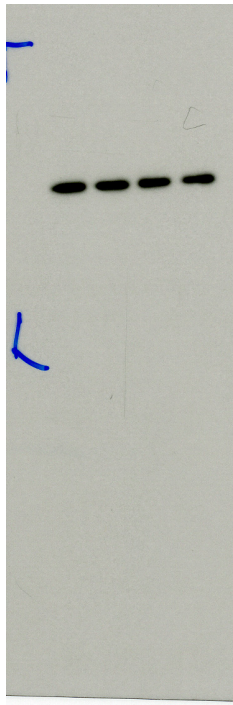

**Figure 7b. H2A**

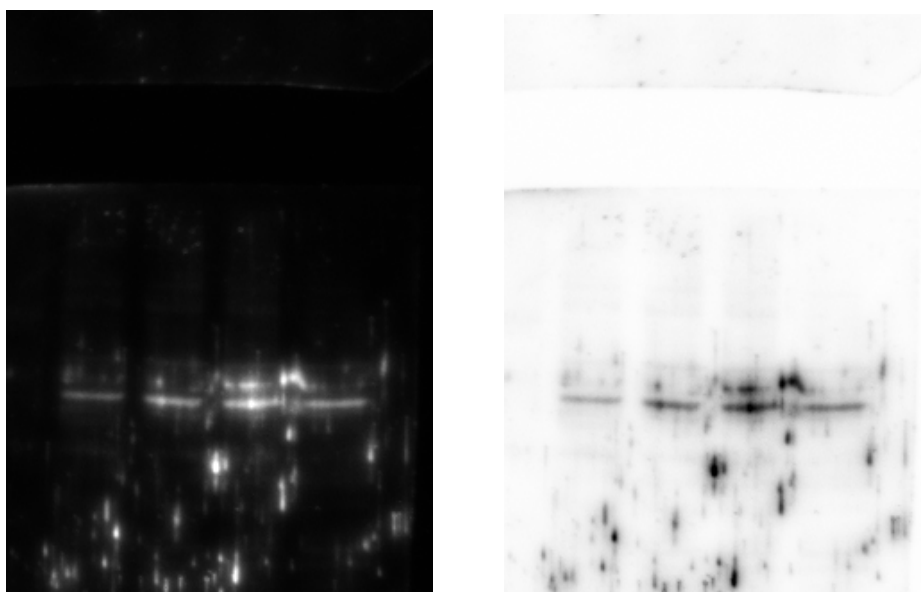

Figure 7c. pIRF3

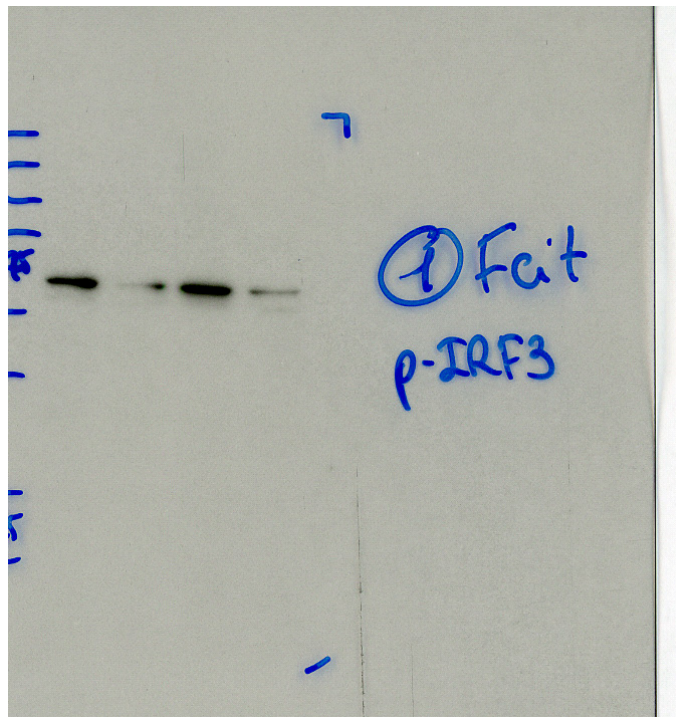

**Figure 7c. IRF3**

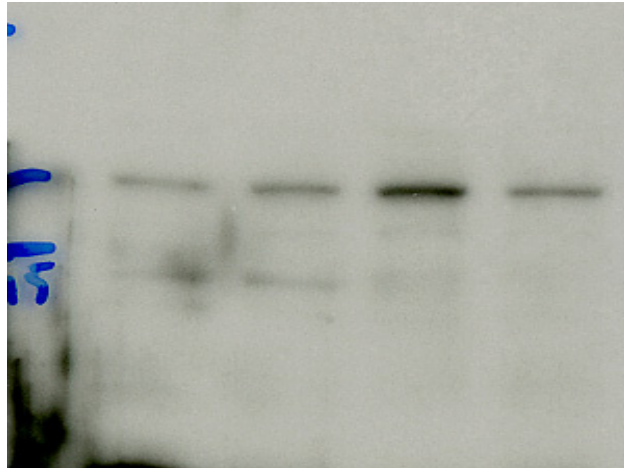

**Figure 7c. Tubulin**

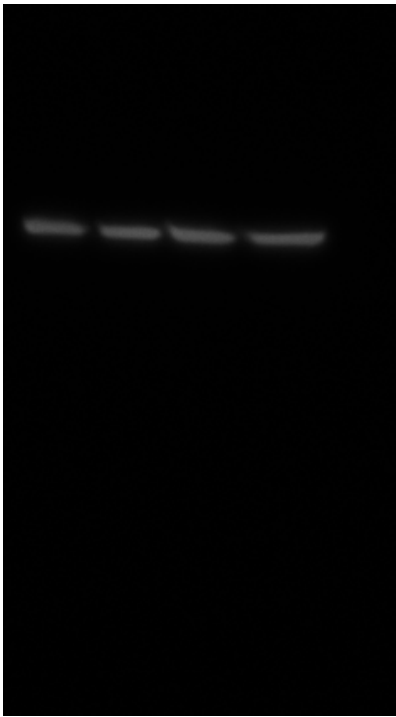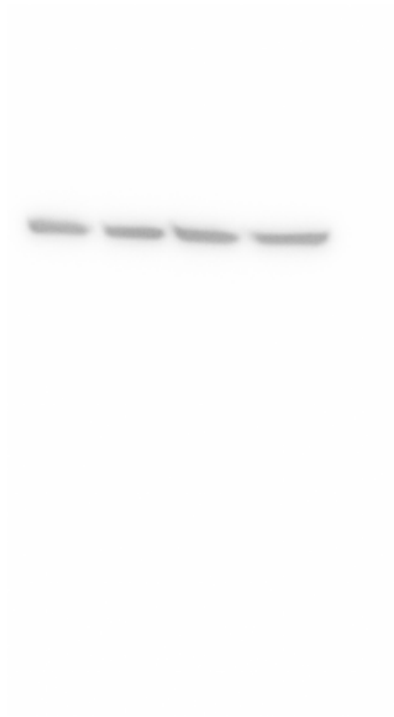

**Figure 7d. pIRF3**

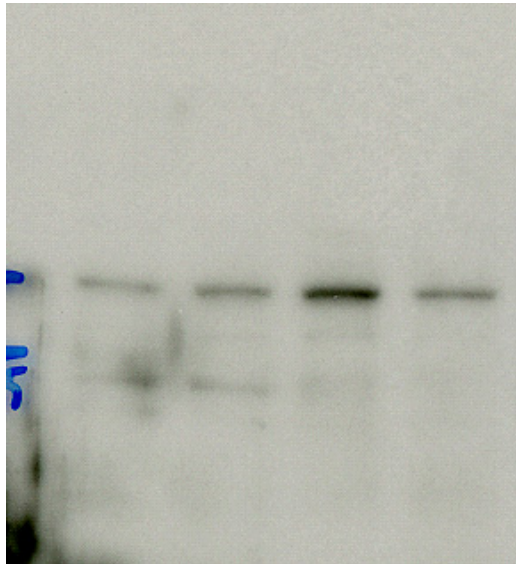

**Figure 7d. IRF3**

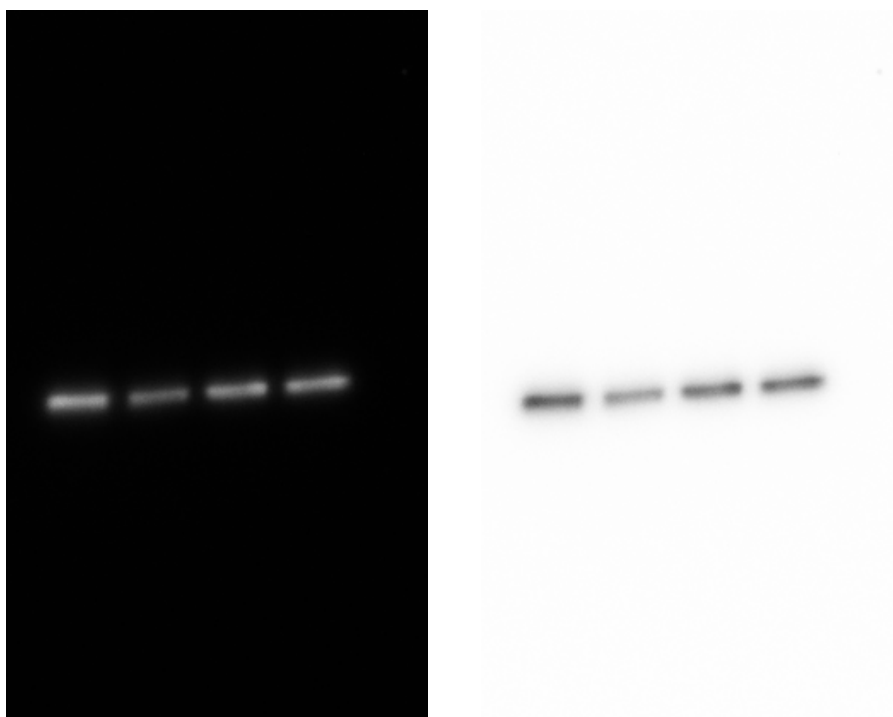

**Figure 7d. H2A**

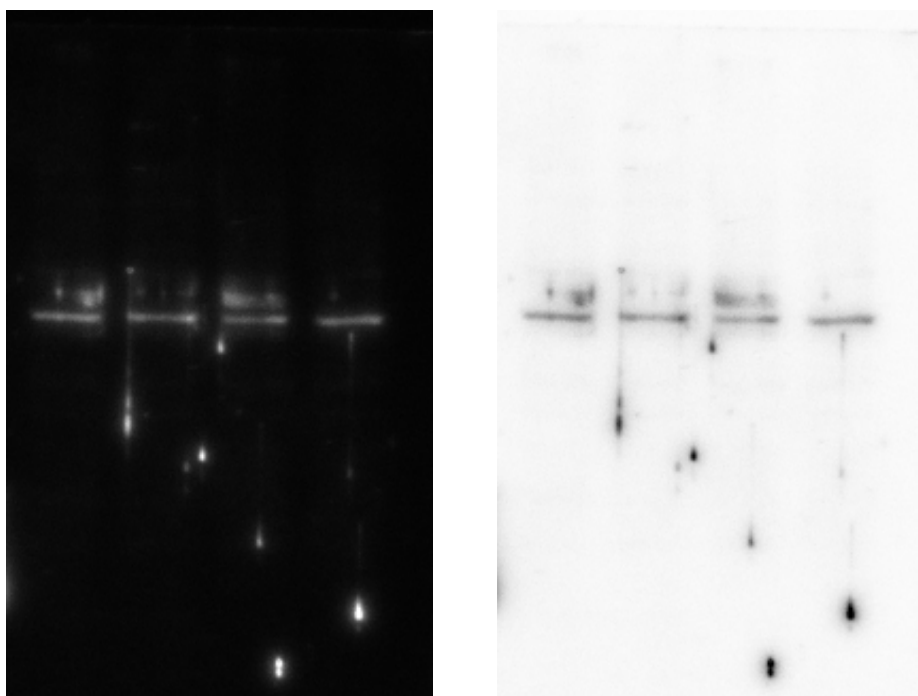

Supplement: s1 [file s1]
